# Supplementary material
Source: PubMed Central journal article supplement (PMC3243485)
Supplement: supp_M018820_jlr.M018820-1.pdf [file supp_M018820_jlr.M018820-1.pdf]

## **SUPPLEMENTAL DATA:**

**Supplemental Figure 1. Hourly appearance of radioactive sterols in lymph and isolated chylomicron triglyceride mass throughout 8 hours.** Percent of (A) [<sup>14</sup>C]-cholesterol and (B) [<sup>3</sup>H]-sitosterol dose appearance in whole lymph at hourly collections. (C) Triglyceride (TG) mass (μg) was measured in isolated chylomicron samples for every hourly collection. The data are expressed as mean±SEM, (n=5/genotype).

**Supplemental Figure 2. Lymph flow rate during 8 hours of thoracic duct lymph collection.** Lymph was collected into tubes with 5% EDTA plus protease inhibitor cocktail at one-hour intervals for 8 continuous hours after thoracic lymph duct cannulation. Data are expressed as percent of radioactive sterol dose recovered in lymph for each animal and represent mean±SEM (n=7-9/genotype). No statistically significant difference (p<0.05) was found by Two-Way ANOVA the 8<sup>th</sup> hour.

**Supplemental Table 1. mRNA expression of genes involved in lipid metabolism.** Mice were fed the sat. diet for 5 weeks and fasted for 4 hours prior to necropsy. Liver and five equidistant segments of the small intestinal (SI-1 to 5) were collected. Pools (n=5/genotype) of each tissue were used to quantify mRNA expression by real-time PCR. Data are in arbitrary units normalized by cyclophilin mRNA expression in the same sample pool. *Mtp*, microsomal transfer protein; *Apob*, apolipoprotein B; *Abca1*, ATP-binding cassette type A1; *Apoa1*,

apolipoprotein A1; *HmgCoAs*; 3-hydroxy-3-methylglutaryl coenzyme A synthase; *HmgCoAr*, 3-hydroxy-3-methylglutaryl coenzyme A reductase; *Lxr*, liver X receptor; *Srebp-1c*; sterol regulatory element-binding protein 1c; *Ppar*, peroxisome proliferator-activated receptor; *Acc*, acetyl-CoA carboxylase.

Supplemental Figure 1

**A** [14C]-Cholesterol in Lymph

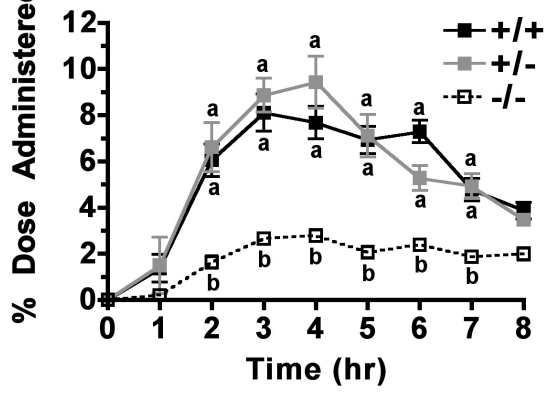

**B** [3H]-Sitosterol in Lymph

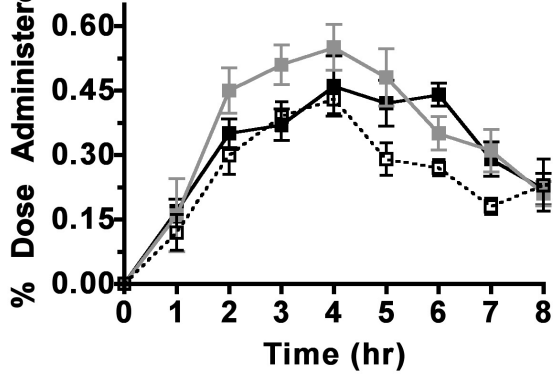

**C** Chylomicron TG

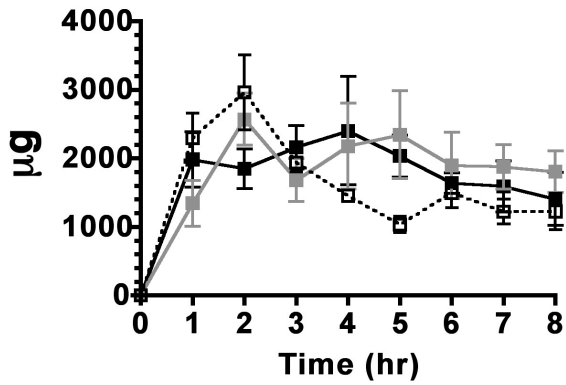

Supplemental Figure 2

### Lymph Flow

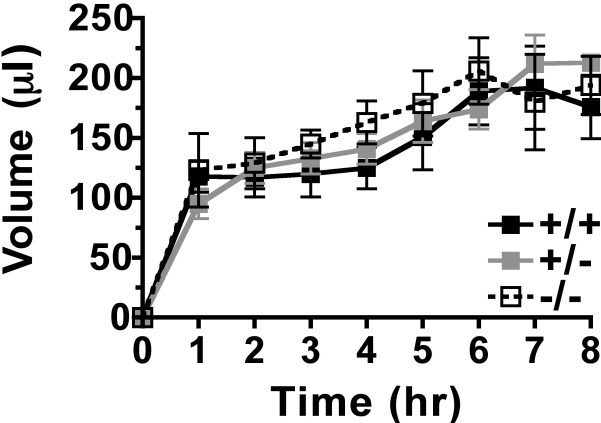

| Supplemental Table 1: mRNA Expression of Lipid Metabolism Genes in Pooled Tissue Samples (n=5/genotype) |            |                                             |      |      |      |      |       |
|---------------------------------------------------------------------------------------------------------|------------|---------------------------------------------|------|------|------|------|-------|
| Gene                                                                                                    | Genotype   | Arbitrary Units (normalized to cyclophilin) |      |      |      |      | Liver |
|                                                                                                         |            | SI-1                                        | SI-2 | SI-3 | SI-4 | SI-5 |       |
| <b><i>Mtp</i></b>                                                                                       | <b>+/+</b> | 1162                                        | 1285 | 998  | 860  | 454  | 144   |
|                                                                                                         | <b>+/-</b> | 1268                                        | 1393 | 1074 | 872  | 460  | 106   |
|                                                                                                         | <b>-/-</b> | 1398                                        | 1167 | 952  | 773  | 407  | 101   |
| <b><i>Apob</i></b>                                                                                      | <b>+/+</b> | 1709                                        | 2223 | 1952 | 2194 | 1427 | 2193  |
|                                                                                                         | <b>+/-</b> | 1795                                        | 2268 | 2493 | 1876 | 1313 | 1668  |
|                                                                                                         | <b>-/-</b> | 1776                                        | 1545 | 1336 | 1119 | 1135 | 1422  |
| <b><i>Abca1</i></b>                                                                                     | <b>+/+</b> | 58                                          | 98   | 107  | 95   | 69   | 149   |
|                                                                                                         | <b>+/-</b> | 67                                          | 126  | 154  | 105  | 65   | 113   |
|                                                                                                         | <b>-/-</b> | 99                                          | 142  | 106  | 87   | 75   | 97    |
| <b><i>Apoa1</i></b>                                                                                     | <b>+/+</b> | 5287                                        | 6421 | 5687 | 5746 | 3358 | 4310  |
|                                                                                                         | <b>+/-</b> | 5474                                        | 7144 | 6534 | 5707 | 3586 | 3255  |
|                                                                                                         | <b>-/-</b> | 5038                                        | 6011 | 4900 | 3911 | 2985 | 3676  |
| <b><i>HmgCoAs</i></b>                                                                                   | <b>+/+</b> | 26                                          | 31   | 31   | 41   | 68   | 21    |
|                                                                                                         | <b>+/-</b> | 28                                          | 36   | 37   | 37   | 78   | 12    |
|                                                                                                         | <b>-/-</b> | 26                                          | 24   | 22   | 24   | 43   | 9     |
| <b><i>HmgCoAr</i></b>                                                                                   | <b>+/+</b> | 18                                          | 22   | 24   | 33   | 38   | 10    |
|                                                                                                         | <b>+/-</b> | 17                                          | 24   | 28   | 31   | 39   | 9     |
|                                                                                                         | <b>-/-</b> | 19                                          | 17   | 20   | 21   | 26   | 7     |
| <b><i>Srebp-1c</i></b>                                                                                  | <b>+/+</b> | 6                                           | 6    | 6    | 5    | 4    | 2     |
|                                                                                                         | <b>+/-</b> | 6                                           | 6    | 6    | 4    | 4    | 1     |
|                                                                                                         | <b>-/-</b> | 6                                           | 4    | 4    | 3    | 3    | 1     |
